# Supplementary material
Source: Springer Nature journal article supplement (https://www.springermedizin.de/resource/supplementary/13023_2014_770_MOESM6_ESM.pdf/9643032)
Supplement: MOESM6 [file 9643032]

| Location       | cDNA                     | Protein                  | Mutation status | Reference                    | Patient     | Number of patients | Sex                  |
|----------------|--------------------------|--------------------------|-----------------|------------------------------|-------------|--------------------|----------------------|
| Exon 1         | c.34_35delCT             | p.Leu12Alafs*67          | Hom             | Cho et al., (2012)           | Family 1    | 1                  | 1 Female             |
| Exon 1         | c.34_35delCT             | p.Leu12Alafs*67          | Hom             | Jaureguiberry et al., (2013) | Family 6    | 1                  | 1 Male               |
| Exon 1         | c.34_35delCT             | p.Leu12Alafs*67          | Het             | Jaureguiberry et al., (2013) | Family 16   | 2                  | 2 Females            |
| Exon 1         | c.174-175ins29           | p.Arg59Argfs*85          | Hom             | Cabral et al., (2013)        | Family 1    | 12                 | 10 Males; 2 Females  |
| Exon 1         | c.217C>T                 | p.Arg73*                 | Het             | Jaureguiberry et al., (2013) | Family 11   | 2                  | 1 Male; 1 Female     |
| Exon1          | c.349_367del19           | p.Leu117Cysfs*22         | Het             | Kantaputra et al., (2013)    | Family 1    | 1                  | 1 Male               |
| Intron 1       | c.405-1G>C               |                          | Het             | Wang et al. (2014)           | Family 1    | 1                  | 1 Female             |
| Exon 2         | c.406C>T                 | p.Arg136*                | Hom             | O'Sullivan et al., (2011)    | Family 1    | 4                  | 1 Male; 3 Females    |
| Exon 2         | c.406C>T                 | p.Arg136*                | Het             | Wang et al., (2013)          | Family 3    | 2                  | 2 Males              |
| Exon 2         | c.406C>T                 | p.Arg136*                | Hom             | Jaureguiberry et al., (2013) | Family 5    | 1                  | 1 Female             |
| Exon 2         | c.518T>G                 | p.Leu173Arg              | Hom             | Jaureguiberry et al., (2013) | Family 9    | 1                  | 1 Male               |
| Intron 2       | c.589+1G>A               |                          | Het             | Jaureguiberry et al., (2013) | Family 2    | 2                  | 1 Male; 1 Female     |
| Intron 2       | c.590-2A>G               | p.Asp197_Ile214delinsVal | Het             | Cho et al., (2012)           | Family 4    | 1                  | 1 Female             |
| Exon 3         | c.612delC                | p.Leu205Cysfs*11         | Het             | Jaureguiberry et al., (2013) | Family 16   | 2                  | 1 Female             |
| Exon 4         | c.641_719del             | p.Ile214Asnfs*46         | Het             | Jaureguiberry et al., (2013) | Family 13   | 2                  | 1 Male; 1 Female     |
| Intron 4       | c.719+1G>C               |                          | Het             | Jaureguiberry et al., (2013) | Family 3    | 2                  | 1Male; 1 Female      |
| Intron 4       | c.720-2A>G               | p.Gln241_Arg271del       | Hom             | Wang et al., (2013)          | Family 2    | 1                  | 1 Male               |
| Exon 5         | c.727C>T                 | p.Arg243*                | Het             | Jaureguiberry et al., (2013) | Family 10   | 1                  | 2 Female             |
| Exon 5         | c.727C>T                 | p.Arg243*                | Het             | Jaureguiberry et al., (2013) | Family 11   | 2                  | 1 Male; 1 Female     |
| Exon 5         | c.755_757delTCT          | p.Phe252del              | Het             | Jaureguiberry et al., (2013) | Family 13   | 2                  | 1 Male; 1 Female     |
| Intron 5       | c.812+2T>G               |                          | Hom             | Jaureguiberry et al., (2013) | Family 14   | 1                  | 1 Female             |
| Intron 5       | c.813-2A>G               | p.Arg271Serfx*70         | Hom             | Cho et al., (2012)           | Family 2    | 4                  | 3 Males; 1 Female    |
| Exon 6         | c.826C>T                 | p.Arg276*                | Het             | Cho et al., (2012)           | Family 4    | 1                  | 1 Female             |
| Exon 6         | c.907_908delAG           | p.Ser303Cysfs*76         | Hom             | Jaureguiberry et al., (2013) | Family 15   | 3                  | 2 Males; 1 Female    |
| Exon 6         | c.913_914delTT           | p.Phe305Leufs*74         | Het             | Jaureguiberry et al., (2013) | Family 2    | 2                  | 1 Male; 1 Female     |
| Exon6          | c.915_918delCTTT         | p.Phe305Leufs*76         | Hom             | Jaureguiberry et al., (2013) | Family 1    | 1                  | 1 Male               |
| Exon 6         | c.915_918delCTTT         | p.Phe305Leufs*76         | Het             | Kantaputra et al., (2013)    | Family 1    | 1                  | 1 Male               |
| Exon 7         | c.992G>A                 | p.Gly331Asp              | Hom             | Wang et al., (2013)          | Family 1    | 3                  | 1 Male 2 Females     |
| Exon 8         | c.1175_1179delGGCTC      | p.Arg392Profs*22         | Hom             | Cho et al., (2012)           | Family 3    | 2                  | 2 Males              |
| Exon 8         | c.1207G>A                | p.Asp403Asn              | Het             | Wang et al. (2014)           | Family 1    | 1                  | 1 Female             |
| Exon 9         | c.1228_1229delGA         | p.Asp410Profs*5          | Het             | Jaureguiberry et al., (2013) | Family 10   | 1                  | 1 Female             |
| Intron 9       | c.1302-2A>G              |                          | Het             | Kantaputra et al., (2013)    | Family 2    | 1                  | 1 Female             |
| Exon10         | c.1348_1349delTC         | p.Ser450Profs*20         | Het             | Jaureguiberry et al., (2013) | Family 3    | 2                  | 1 Male; 1 Female     |
| Intron 10      | c.1361+4del              |                          | Hom             | Wang et al. (2014)           | Family 2    | 2                  | 1Male; 1 Female      |
| Exon 11        | c.1369A>T                | p.Lys457*                | Hom             | Jaureguiberry et al., (2013) | Family 12   | 1                  | 1 Female             |
| Exon 11        | c.1432C>T                | p.Arg478*                | Hom             | Jaureguiberry et al., (2013) | Family 8    | 1                  | 1 Male               |
| Exon 11        | c.1432C>T                | p.Arg478*                | Het             | Wang et al., (2013)          | Family 3    | 2                  | 1 Male; 1 Female     |
| Exon 11        | c.1480delC               | p.His494fs*13            | Het             | Kantaputra et al., (2013)    | Family 2    | 1                  | 1 Female             |
| Exon 11        | c.1475_1482dupAACCCAC    | p.Leu495Asnfs*15         | Hom             | Jaureguiberry et al., (2013) | Family 4    | 2                  | 1 Male; 1 Female     |
| Exon 11        | c.1513delA               | p.Ile505Serfs*2          | Hom             | Jaureguiberry et al., (2013) | Family 7    | 2                  | 1 Male; 1 Female     |
| Total reported | 40 (33 unique mutations) |                          | 18 Hom; 22 Het  |                              | 29 Families | 60 index cases     | 32 Males; 28 Females |
